# Supplementary material
Source: bioRxiv or medRxiv preprint supplement (https://www.biorxiv.org/highwire/filestream/15184/field_highwire_adjunct_files/1/054924-2.pdf)

**A**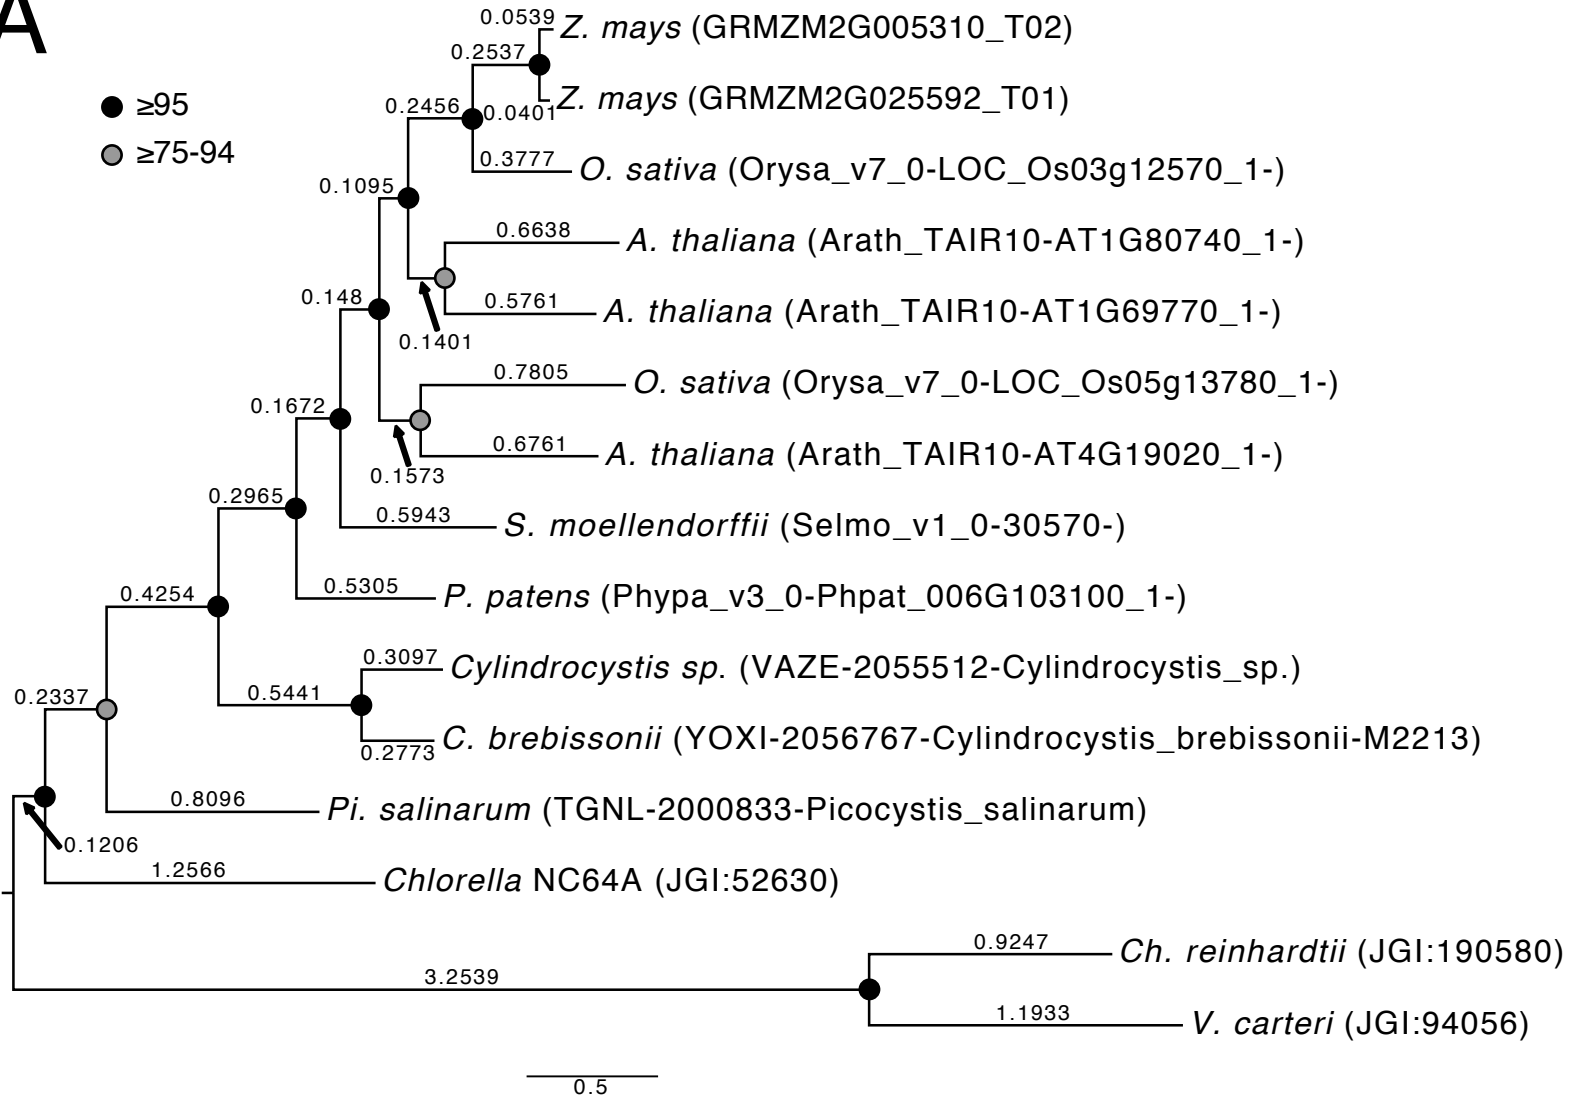**B**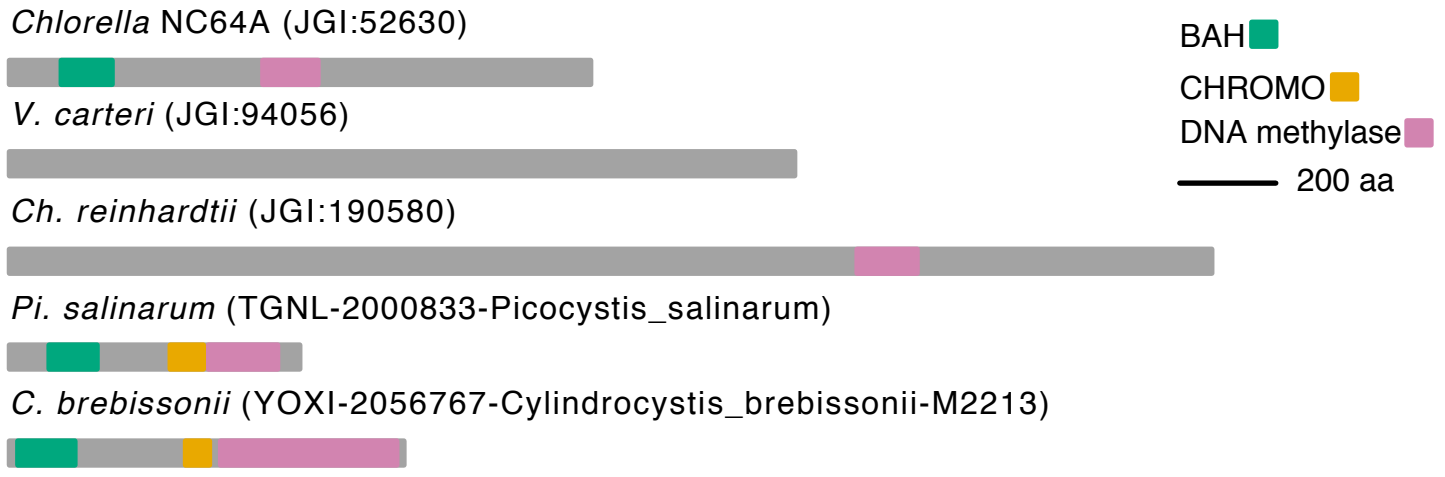

Supplement: Supplementary file [file 054924-2.pdf]
